# Supplementary material for: MicroRNA-497 Reduction and Increase of Its Family Member MicroRNA-424 Lead to Dysregulation of Multiple Inflammation Related Genes in Synovial Fibroblasts With Rheumatoid Arthritis
Source: PubMed Central journal article supplement (PMC8034293; doi:10.3389/fimmu.2021.619392), 2021-03-26
Supplement: DataSheet_1.pdf [file DataSheet_1.pdf]

## **Supplementary materials**

Supplementary materials include patient and primer information, cytokine arrangement of cytokine antibody array, Tarbase and Targetscan database verification information, and gene literature summary.

**Supplementary table 1:Schematic diagram of miR-15/107 gene family sequence**

| <b>name</b>     | <b>Accession number</b> | <b>sequence</b>                |
|-----------------|-------------------------|--------------------------------|
| hsa-miR-15a-5p  | MIMAT0000068            | <b>UAGCAGCACAUAAUGGUUUGUG</b>  |
| hsa-miR-16-5p   | MIMAT0000069            | <b>UAGCAGCACGUAAAUAUUGGCG</b>  |
| hsa-miR-103a-3p | MIMAT0000101            | <b>AGCAGCAUUGUACAGGGCUAUGA</b> |
| hsa-miR-195-5p  | MIMAT0000461            | <b>UAGCAGCACAGAAAUAUUGGC</b>   |
| hsa-miR-107     | MIMAT0000104            | <b>AGCAGCAUUGUACAGGGCUAUCA</b> |
| hsa-miR-424-5p  | MIMAT0001341            | <b>CAGCAGCAAUUCAUGUUUUGAA</b>  |
| hsa-miR-497-5p  | MIMAT0002820            | <b>CAGCAGCACACUGUGGUUUGU</b>   |
| hsa-miR-503-5p  | MIMAT0002874            | <b>UAGCAGCGGGAACAGUUCUGCAG</b> |
| hsa-miR-646     | MIMAT0003316            | <b>AAGCAGCUGCCUCUGAGGC</b>     |
| hsa-miR-6838-5p | MIMAT0027578            | <b>AAGCAGCAGUGGCAAGACUCCU</b>  |

**Supplementary table 2: Patient characteristics**

| <b>Patient</b> | <b>Gender</b> | <b>Age<br/>(years)</b> | <b>Disease<br/>duration<br/>(years)</b> | <b>RF<br/>(IU/ml)</b> | <b>ESR<br/>(mm/h)</b> | <b>CRP<br/>(mg/l)</b> |
|----------------|---------------|------------------------|-----------------------------------------|-----------------------|-----------------------|-----------------------|
| OA1            | Female        | 68                     | 16                                      | 9                     | 8                     | 3                     |
| OA2            | Female        | 71                     | 18                                      | 4                     | 9                     | 9                     |
| OA3            | Male          | 76                     | 23                                      | 3                     | 16                    | 4                     |
| OA4            | Female        | 72                     | 12                                      | 7                     | 17                    | 8                     |
| OA5            | Female        | 58                     | 13                                      | 6                     | 7                     | 2                     |
| OA6            | Male          | 71                     | 13                                      | 5                     | 12                    | 9                     |
| OA7            | Female        | 63                     | 12                                      | 6                     | 21                    | 6                     |
| OA8            | Male          | 72                     | 18                                      | 7                     | 7                     | 10                    |
| RA1            | Male          | 64                     | 12                                      | 254                   | 53                    | 13                    |
| RA2            | Female        | 48                     | 10                                      | 131                   | 51                    | 62                    |
| RA3            | Female        | 53                     | 7                                       | 378                   | 31                    | 15                    |
| RA4            | Female        | 51                     | 9                                       | 63                    | 45                    | 45                    |
| RA5            | Female        | 55                     | 6                                       | 157                   | 57                    | 27                    |
| RA6            | Male          | 69                     | 11                                      | 59                    | 53                    | 22                    |
| RA7            | Female        | 74                     | 12                                      | 257                   | 59                    | 17                    |
| RA8            | Female        | 62                     | 10                                      | 212                   | 43                    | 18                    |

RF, rheumatoid factor; ESR, erythrocyte sedimentation rate; CRP, C-reactive protein;  
CCP, cyclic citrullinated peptide  
Anti-CCP antibody are all positive for RA patients.

**Supplementary table 3: MiRNA mimic and inhibitor sequence information**

| <b>name</b>       | <b>product</b> | <b>Sequence (from 5' to 3')</b>                                  |
|-------------------|----------------|------------------------------------------------------------------|
| <b>miRNA NC</b>   | Mimic          | Sense UUCUCCGAACGUGUCACGUTT<br>Antisense ACGUGACACGUUCGGAGAATT   |
| <b>miR-424-5p</b> | Mimic          | Sense CAGCAGCAAUUCAUGUUUUGAA<br>Antisense CAAAACAUGAAUUGCUGCUGUU |
| <b>miR-497-5p</b> | Mimic          | Sense CAGCAGCACACUGUGGUUUGU<br>Antisense AAACCACAGUGUGCUGCUGUU   |
| <b>miRNA NC</b>   | Inhibitor      | CAGUACUUUUGUGUAGUACAA                                            |
| <b>miR-424-5p</b> | Inhibitor      | UUCAAAACAUGAAUUGCUGCUG                                           |
| <b>miR-497-5p</b> | Inhibitor      | ACAAACCACAGUGUGCUGCUG                                            |

NC: negative control

**Supplementary table 4: siRNA sequence information**

| <b>name</b>                  | <b>product</b> | <b>Sequence (from 5' to 3')</b>                                |
|------------------------------|----------------|----------------------------------------------------------------|
| <b>NC siRNA</b>              | siRNA          | Sense UUCUCCGAACGUGUCACGUTT<br>Antisense ACGUGACACGUUCGGAGAATT |
| <b><i>DICER1</i> siRNA 1</b> | siRNA          | Sense GGACCAUUUACUGACAGAATT<br>Antisense UUCUGUCAGUAAAUGGUCCTT |
| <b><i>DICER1</i> siRNA 2</b> | siRNA          | Sense GGCCAUUGGACACAUCAAUTT<br>Antisense AUUGAUGUGUCCAAUGGCCTT |
| <b><i>DICER1</i> siRNA 3</b> | siRNA          | Sense CCUCCUGGUUAUGUAGUAATT<br>Antisense UUACUACAUAACCAGGAGGTT |

**Supplementary table 5: Primer information**

| <b>Gene symbol</b>                 | <b>Ta *(°C)</b> |         | <b>Sequences (from 5' to 3')</b> |
|------------------------------------|-----------------|---------|----------------------------------|
| <b>hsa-miR-15a-5p</b>              | 60              | Forward | UAGCAGCACAUAAUGGUUUGUG           |
| <b>hsa-miR-16-5p</b>               | 60              | Forward | UAGCAGCACGUAAAUAUUGGCG           |
| <b>hsa-miR-103a-3p</b>             | 60              | Forward | AGCAGCAUUGUACAGGGCUAUGA          |
| <b>hsa-miR-195-5p</b>              | 60              | Forward | UAGCAGCACAGAAAUAUUGGC            |
| <b>hsa-miR-107</b>                 | 60              | Forward | AGCAGCAUUGUACAGGGCUAUCA          |
| <b>hsa-miR-424-5p</b>              | 60              | Forward | CAGCAGCAAUUCAUGUUUUGAA           |
| <b>hsa-miR-497-5p</b>              | 60              | Forward | CAGCAGCACACUGUGGUUUGU            |
| <b>hsa-miR-503-5p</b>              | 60              | Forward | UAGCAGCGGGAACAGUUCUGCAG          |
| <b>hsa-miR-646</b>                 | 60              | Forward | AAGCAGCUGCCUCUGAGGC              |
| <b>hsa-miR-6838-5p</b>             | 60              | Forward | AAGCAGCAGUGGCAAGACUCCU           |
| <b>RNU6 (U6 small nuclear RNA)</b> | 60              | Forward | CTCGCTTCGGCAGCACA                |
|                                    |                 | Reverse | AACGCTTCACGAATTTGCGT             |
| <b>IL1B</b>                        | 59              | Forward | AGAAGTACCTGAGCTCGCCA             |
|                                    |                 | Reverse | CTGGAAGGAGCACTTCATCTGT           |
| <b>IL6</b>                         | 61              | Forward | CAATCTGGATTCAATGAGGAGAC          |
|                                    |                 | Reverse | CTCTGGCTTGTTCTCACTACTC           |
| <b>IL8</b>                         | 61              | Forward | TGGAGAAGTTTTTGAAGAGGGCT          |
|                                    |                 | Reverse | ACAGACCCACACAATACATGAAG          |
| <b>MMP3</b>                        | 59              | Forward | AGTCTTCCAATCCTACTGTTGCT          |
|                                    |                 | Reverse | TCCCCGTCACCTCCAATCC              |
| <b>MMP13</b>                       | 59              | Forward | AATATCTGAACTGGGTCTTCCAAAA        |
|                                    |                 | Reverse | CAGACCTGGTTTCCTGAGAACAG          |
| <b>TGFB</b>                        | 59              | Forward | CTAATGGTGGAAACCCACAACG           |
|                                    |                 | Reverse | TATCGCCAGGAATTGTTGCTG            |
| <b>TLR3</b>                        | 54              | Forward | GCTAGCAGTCATCCAACAGAATC          |
|                                    |                 | Reverse | AGTCAACTTCAGGTGGCTGC             |
| <b>TLR4</b>                        | 54              | Forward | AATCTAGAGCACTTGGACCTTCC          |
|                                    |                 | Reverse | GGGTTCAAGGACAGGTCTAAAGA          |
| <b>BCL2</b>                        | 60              | Forward | AGGCTGGGATGCCTTTGTGG             |
|                                    |                 | Reverse | TTTGTGTTGGGGCAGGCATGT            |
| <b>TRIM23</b>                      | 60              | Forward | AACAAACAGGATGTTGCTGGAG           |
|                                    |                 | Reverse | GAGCCAGTCCAACCCTTCAT             |
| <b>SUMO3</b>                       | 60              | Forward | GAGAGGCAGGGCTTGTCAT              |
|                                    |                 | Reverse | CGGGCCCTCTAGAACTGTG              |

|              |    |         |                          |
|--------------|----|---------|--------------------------|
| <b>CEP55</b> | 60 | Forward | ACTTTTGGAGAAAATTCGAGTCCT |
|              |    | Reverse | GTTGGTCTCTCAGTCGCTGT     |
| <b>E2F1</b>  | 60 | Forward | GCCATCCAGGAAAAGGTGTGA    |
|              |    | Reverse | GTGATGTCATAGATGCGCCG     |
| <b>CCNA2</b> | 60 | Forward | CCAGGAGAATATCAACCCGGA    |
|              |    | Reverse | GGTGCAACCCGTCTCGT        |
| <b>KCNN4</b> | 60 | Forward | CCGAGAGGCAGGCTGTTAAT     |
|              |    | Reverse | CAGACGATCTTGCCCCACAT     |
| <b>GAPDH</b> | 60 | Forward | CACCCACTCCTCCACCTTTG     |
|              |    | Reverse | CCACCACCCTGTTGCTGTAG     |

\* : Annealing Temperature

**Supplementary table 6:  
Cytokine arrangement of RayBio® C-Series human cytokine antibody array C5.**

|          | <b>A</b> | <b>B</b>      | <b>C</b>     | <b>D</b>      | <b>E</b>     | <b>F</b>       | <b>G</b>      | <b>H</b>       | <b>I</b>       | <b>J</b>  | <b>K</b>      |
|----------|----------|---------------|--------------|---------------|--------------|----------------|---------------|----------------|----------------|-----------|---------------|
| <b>1</b> | POS      | POS           | POS          | POS           | NEG          | NEG            | ENA-78        | G-CSF          | GM-CSF         | GRO       | GRO- $\alpha$ |
| <b>2</b> | I-309    | IL-1 $\alpha$ | IL-1 $\beta$ | IL-2          | IL-3         | IL-4           | IL-5          | IL-6           | IL-7           | IL-8      | IL-10         |
| <b>3</b> | IL12-p40 | IL-13         | IL-15        | IFN- $\gamma$ | MCP-1        | MCP-2          | MCP-3         | M-CSF          | MDC            | MIG       | MIP-1 $\beta$ |
| <b>4</b> | MIP-1-   | RANTES        | SCF          | SDF-1         | TARC         | TGF- $\beta$ 1 | TNF- $\alpha$ | TNF- $\beta$   | EGF            | IGF-1     | Angiogenin    |
| <b>5</b> | OSM      | TPO           | VEGF         | PDGF-BB       | Leptin       | BDNF           | BLC           | CK $\beta$ 8-1 | Eotaxin        | Eotaxin-2 | Eotaxin-3     |
| <b>6</b> | FGF-4    | FGF-6         | FGF-7        | FGF-9         | FLT-3 Ligand | Fractalkine    | GCP-2         | GDNF           | HGF            | IGFBP-1   | IGFBP-2       |
| <b>7</b> | IGFBP-3  | IGFBP-4       | IL-16        | IP-10         | LIF          | LIGHT          | MCP-4         | MIF            | MIP-3 $\alpha$ | NAP-2     | NT-3          |
| <b>8</b> | NT-4     | OPN           | OPG          | PARC          | PIGF         | TGF- b 2       | TGF- b 3      | TIMP-1         | TIMP-2         | POS       | POS           |



**Supplementary table 7:**  
**Dysregulated genes in RASF after gain of miR-424 function detected by using mRNA deep sequencing**

| <b>Gene Symbol</b>    | <b>Regulation after transfected with mimic</b> | <b>padj</b> | <b>Function in literature</b>                                                                                                                                                                     | <b>Outcome after transfected with mimic</b>          |
|-----------------------|------------------------------------------------|-------------|---------------------------------------------------------------------------------------------------------------------------------------------------------------------------------------------------|------------------------------------------------------|
| <b>ZNF367</b>         | Down                                           | 6.56E-08    | ZNF367 knockdown increased proliferation in vitro and vivo, also increased cellular invasion and migration. <sup>1</sup>                                                                          | Promote the proliferation                            |
| <b>BTRC</b>           | Down                                           | 3.80E-08    | BTRC is negative factors controlling IκB degradation in the type 1 TNF receptor (TNF-RI) and IL-1R pathways upon TNF-α and IL-1β stimulation. <sup>2</sup>                                        | inhibit the degradation of IκB                       |
| <b>CCNA2</b>          | Down                                           | 0.00832     | CCNE2 or CCNA2 silencing markedly decreased abl cell and CWR22Rv1 cell growth. <sup>3</sup>                                                                                                       | inhibit proliferation                                |
| <b>CD83</b>           | Down                                           | 0.00162     | In mixed leukocyte reaction (MLR), sCD83 inhibits DC-mediated T cell activation and proliferation. <sup>4</sup>                                                                                   | Promote the proliferation                            |
| <b>CDC6</b>           | Down                                           | 0.01602     | Down-regulation of CDC6 in HO8910 cells decreased cell proliferation and colony formation. <sup>5</sup>                                                                                           | inhibit proliferation                                |
| <b>CEP55</b>          | Down                                           | 0.00328     | knockdown of CEP55 markedly inhibited cell viability and proliferation and CEP55-silenced cells were obviously arrested in the G0/G1 phase and presented significant cell apoptosis. <sup>6</sup> | inhibit proliferation and promote apoptosis          |
|                       |                                                |             | CEP55 knockdown significantly induced cell cycle arrest at G1 phase and suppressed OS cell proliferation, migration and invasion. <sup>7</sup>                                                    | inhibit proliferation                                |
| <b>E2F1</b>           | Down                                           | 0.01955     | E2F1 silencing effectively downregulated expression of canonical E2F target genes and suppressed RANKL-induced osteoclast genesis. <sup>8</sup>                                                   | Suppress osteoclast genesis                          |
| <b>E2F2</b>           | Down                                           | 3.65E-05    | In embryonic fibroblasts (MEF) of E2F2 knockout mice, the expression of IL-1α, IL-1β and TNF-α was suppressed. <sup>9</sup>                                                                       | Upregulate the expression of IL-1α, IL-1β, and TNF-α |
|                       |                                                |             | Silencing E2F2 suppresses the proliferation, migration, and invasion of RASFs in vitro. <sup>10</sup>                                                                                             | inhibit proliferation                                |
| <b>KCNN4 (KCa3.1)</b> | Down                                           | 0.00240     | Different concentrations of the KCa3.1 inhibitor significantly reduced the proliferation of RASFs. <sup>11</sup>                                                                                  | inhibit proliferation                                |
| <b>STMN1</b>          | Down                                           | 0.00111     | Inhibition of STMN1 showed a decrease in cell proliferation. <sup>9</sup>                                                                                                                         | inhibit proliferation                                |

**Supplementary table 8:  
Dysregulated genes in RASF after gain of miR-497 function detected by using  
mRNA deep sequencing**

| <b>Gene Symbol</b> | <b>Regulation after transfected with mimic</b> | <b>p<sub>adj</sub>*</b> | <b>Function in literature</b>                                                                                                                                          | <b>Outcome after transfected with mimic</b> |
|--------------------|------------------------------------------------|-------------------------|------------------------------------------------------------------------------------------------------------------------------------------------------------------------|---------------------------------------------|
| <b>BCL2</b>        | Down                                           | 1.10E-06                | SF Treg cells transcribing high levels of Bcl-2 and microRNA-21 demonstrate limited apoptosis in RA <sup>12</sup> .                                                    | Promote apoptosis                           |
| <b>TRIM23</b>      | Down                                           | 8.16E-11                | Overexpression of TRIM23 can activate the NF-κB pathway <sup>13</sup>                                                                                                  | Inhibit NF-κB pathway                       |
| <b>SUMO3</b>       | Down                                           | 1.28E-07                | The knockdown of SUMO-2/3 significantly increased the TNF-α and IL-1β, induced expression of MMP-3 and MMP-13, accompanied by increased NF-κB activity <sup>14</sup> . | Promote NF-κB pathway                       |

\* : p-value adjusted

**Supplementary table 9: Validated miR-424 target genes from Tarbase.**

| <b>Gene name</b> | <b>miRNA name</b> | <b>Experiments<br/>throughput</b> | <b>Cell lines</b>                                       | <b>Tissues</b>                                                    |
|------------------|-------------------|-----------------------------------|---------------------------------------------------------|-------------------------------------------------------------------|
| PDCD4            | hsa-miR-424-5p    | low: 0 high: 6                    | BETA Cells, 293S,<br>HEK293, HELA                       | Pancreas, Cervix, Kidney                                          |
| BCL2             | hsa-miR-424-5p    | low: 0 high: 3                    | EF3DAGO2, HEK293,<br>HELA                               | Cervix, Kidney                                                    |
| CCNE1            | hsa-miR-424-5p    | low: 3 high: 5                    | THP1, HEPG2, HELA,<br>293S, HEK293                      | Peripheral Blood, Liver,<br>Cervix, Kidney                        |
| CCNE2            | hsa-miR-424-5p    | low: 1 high: 0                    | THP1                                                    | Peripheral Blood                                                  |
| CCND1            | hsa-miR-424-5p    | low: 2 high: 11                   | THP1, HEPG2,<br>MDAMB231,<br>HEK293,293S, HS5,<br>HS27A | Mammary Gland,<br>Peripheral Blood, Liver,<br>Kidney, Bone Marrow |
| CCND3            | hsa-miR-424-5p    | low: 1 high: 0                    | HEPG2                                                   | Liver                                                             |

**Supplementary table 10: Validated miR-497 target genes from Tarbase.**

| <b>Gene name</b> | <b>miRNA name</b> | <b>Experiments<br/>throughput</b> | <b>Cell lines</b>                                             | <b>Tissues</b>                            |
|------------------|-------------------|-----------------------------------|---------------------------------------------------------------|-------------------------------------------|
| <b>PDCD4</b>     | hsa-miR-497-5p    | low: 0 high: 8                    | BETA Cells, 293S, HELA                                        | Pancreas, Cervix,<br>Kidney, Brain        |
| <b>BCL2</b>      | hsa-miR-497-5p    | low: 0 high: 2                    | EF3DAGO2, HELA                                                | Cervix                                    |
| <b>CCNE1</b>     | hsa-miR-497-5p    | low: 5 high: 3                    | HELA, 293S, MDAMB231,<br>SKHEP1, HEPG2, HEK293T               | Mammary Gland,<br>Liver, Cervix, Kidney   |
| <b>CCND1</b>     | hsa-miR-497-5p    | low: 5 high: 7                    | HEK293A, SGC7901,<br>SKHEP1, HEPG2, 293S, HS5,<br>HS27A, HMSC | Gastric, Liver,<br>Kidney, Bone<br>Marrow |
| <b>CCND3</b>     | hsa-miR-497-5p    | low: 3 high: 0                    | SKHEP1, HEPG2                                                 | Liver                                     |

**Supplementary table 11: Validated DICER1 and miRNA target relationship from Tarbase**

| <b>Gene name</b> | <b>miRNA name</b> | <b>Experiments throughput</b> | <b>Cell lines</b>   | <b>Tissues</b>                                |
|------------------|-------------------|-------------------------------|---------------------|-----------------------------------------------|
| <b>DICER1</b>    | hsa-miR-424-5p    | low: 1 high: 2                | THP1, MDAMB231,293S | Peripheral Blood,<br>Mammary Gland,<br>Kidney |
| <b>DICER1</b>    | hsa-miR-497-5p    | low: 0 high: 3                | 293S                | Kidney                                        |

References:

- 1 Jain, M. *et al.* ZNF367 inhibits cancer progression and is targeted by miR-195. *PloS one* **9**, e101423, doi:10.1371/journal.pone.0101423 (2014).
- 2 Mu, N. *et al.* A novel NF-kappaB/YY1/microRNA-10a regulatory circuit in fibroblast-like synoviocytes regulates inflammation in rheumatoid arthritis. *Scientific reports* **6**, 20059, doi:10.1038/srep20059 (2016).
- 3 Zhang, C. *et al.* Definition of a FoxA1 Cistrome that is crucial for G1 to S-phase cell-cycle transit in castration-resistant prostate cancer. *Cancer research* **71**, 6738-6748, doi:10.1158/0008-5472.CAN-11-1882 (2011).
- 4 Lechmann, M. *et al.* The extracellular domain of CD83 inhibits dendritic cell-mediated T cell stimulation and binds to a ligand on dendritic cells. *J Exp Med* **194**, 1813-1821, doi:10.1084/jem.194.12.1813 (2001).
- 5 Deng, Y. *et al.* High expression of CDC6 is associated with accelerated cell proliferation and poor prognosis of epithelial ovarian cancer. *Pathol Res Pract* **212**, 239-246, doi:10.1016/j.prp.2015.09.014 (2016).
- 6 Liu, L., Mei, Q., Zhao, J., Dai, Y. & Fu, Q. Suppression of CEP55 reduces cell viability and induces apoptosis in human lung cancer. *Oncology reports* **36**, 1939-1945, doi:10.3892/or.2016.5059 (2016).
- 7 Xu, L. *et al.* CEP55 promotes the proliferation and invasion of tumour cells via the AKT signalling pathway in osteosarcoma. *Carcinogenesis* **39**, 623-631, doi:10.1093/carcin/bgy017 (2018).
- 8 Murata, K. *et al.* Hypoxia-Sensitive COMMD1 Integrates Signaling and Cellular Metabolism in Human Macrophages and Suppresses Osteoclastogenesis. *Immunity* **47**, 66-79 e65, doi:10.1016/j.immuni.2017.06.018 (2017).
- 9 Wang, S., Wang, L., Wu, C., Sun, S. & Pan, J. H. E2F2 directly regulates the STAT1 and PI3K/AKT/NF-kappaB pathways to exacerbate the inflammatory phenotype in rheumatoid arthritis synovial fibroblasts and mouse embryonic fibroblasts. *Arthritis research & therapy* **20**, 225, doi:10.1186/s13075-018-1713-x (2018).
- 10 Zhang, R., Wang, L., Pan, J.-h. & Han, J. A critical role of E2F transcription factor 2 in proinflammatory cytokines-dependent proliferation and invasiveness of fibroblast-like synoviocytes in rheumatoid Arthritis. *Scientific reports* **8**, doi:10.1038/s41598-018-20782-7 (2018).
- 11 Friebel, K., Schonherr, R., Kinne, R. W. & Kunisch, E. Functional role of the KCa3.1 potassium channel in synovial fibroblasts from rheumatoid arthritis patients. *J Cell Physiol* **230**, 1677-1688, doi:10.1002/jcp.24924 (2015).
- 12 van der Geest, K. S. *et al.* SF Treg cells transcribing high levels of Bcl-2 and microRNA-21 demonstrate limited apoptosis in RA. *Rheumatology (Oxford)* **54**, 950-958, doi:10.1093/rheumatology/keu407 (2015).
- 13 Poole, E. *et al.* Identification of TRIM23 as a cofactor involved in the regulation of

NF-kappaB by human cytomegalovirus. *Journal of virology* **83**, 3581-3590, doi:10.1128/JVI.02072-08 (2009).

- 14 Frank, S. *et al.* Regulation of matrixmetalloproteinase-3 and matrixmetalloproteinase-13 by SUMO-2/3 through the transcription factor NF-kappaB. *Annals of the rheumatic diseases* **72**, 1874-1881, doi:10.1136/annrheumdis-2012-202080 (2013).
